# Supplementary material
Source: PubMed Central journal article supplement (PMC9892775)
Supplement: mmc1.pdf [file mmc1.pdf]

**Supplemental information**

**An intronic GAA repeat expansion in *FGF14* causes  
the autosomal-dominant adult-onset  
ataxia SCA50/ATX-FGF14**

**Haloom Rafehi, Justin Read, David J. Szmulewicz, Kayli C. Davies, Penny Snell, Liam G. Fearnley, Liam Scott, Mirja Thomsen, Greta Gillies, Kate Pope, Mark F. Bennett, Jacob E. Munro, Kathie J. Ngo, Luke Chen, Mathew J. Wallis, Ernest G. Butler, Kishore R. Kumar, Kathy HC. Wu, Susan E. Tomlinson, Stephen Tisch, Abhishek Malhotra, Matthew Lee-Archer, Egor Dolzhenko, Michael A. Eberle, Leslie J. Roberts, Brent L. Fogel, Norbert Brüggemann, Katja Lohmann, Martin B. Delatycki, Melanie Bahlo, and Paul J. Lockhart**

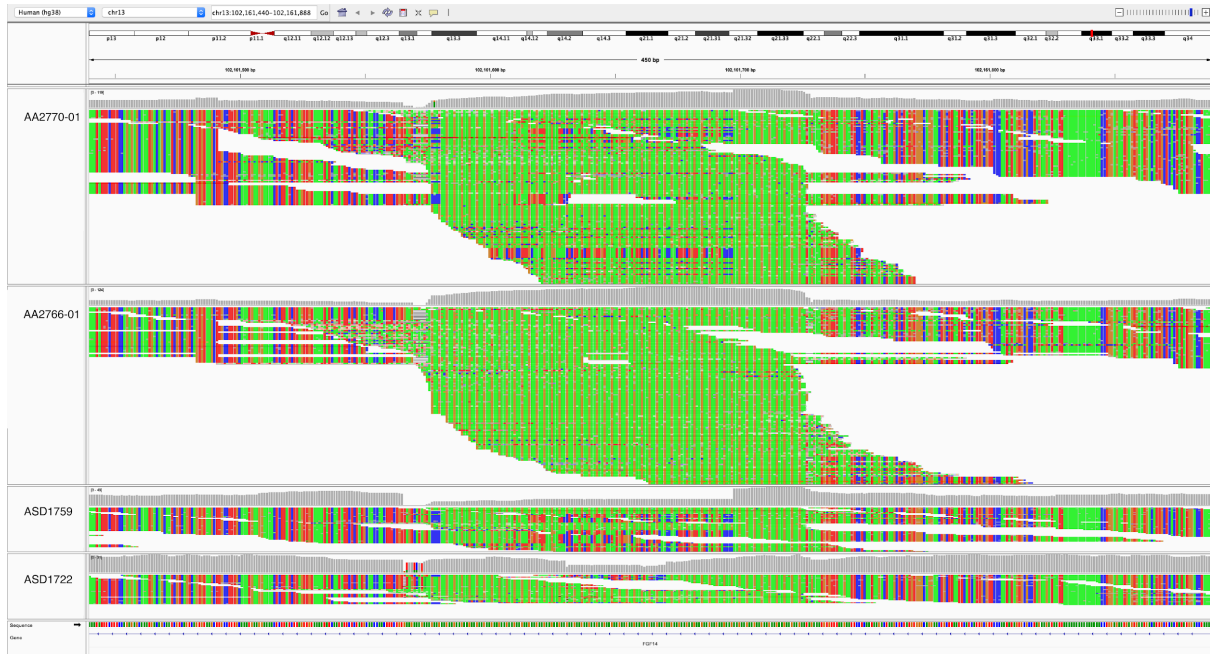

**Figure S1: IGV snapshots of the  $(GAA)_n$  locus in *FGF14*.**

Visualization of the GS reads in IGV for individuals with an expanded  $(GAA)$  RE (top two images) compared to controls (bottom two images).

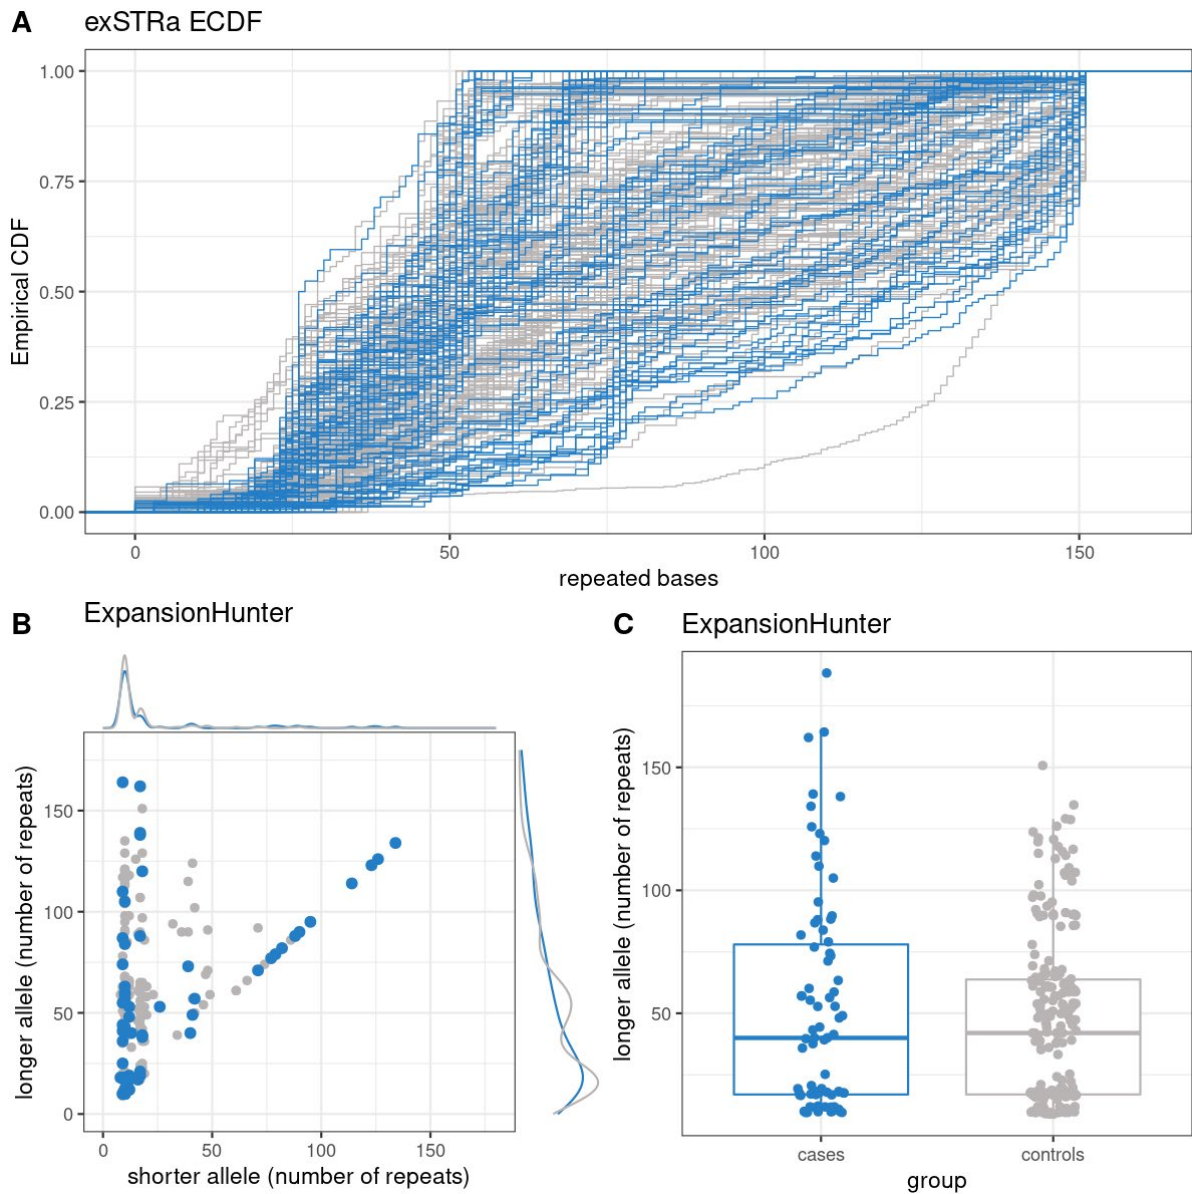

**Figure S2: Plots of exSTRa and ExpansionHunter outputs for the *FGF14* (GAA) locus**

The *FGF14* (GAA) STR was profiled in cases (blue) and controls (grey) using bioinformatic tools, showing inability of bioinformatic tools to accurately estimate the size of the *FGF14* STR, particularly for alleles with  $>(GAA)_{100}$ . (A) exSTRa ECDF plot fails to distinguish outliers, due to the high variability of and large size of the STR in the general population. (B) Size estimates of the *FGF14* (GAA) STR were determined using ExpansionHunter. Density plots are show the allele repeat distributions for cases (blue) and controls (grey) for the longer (y-axis) and shorter (x-axis) alleles. (C) Comparison of longer allele size determined by ExpansionHunter in cases versus controls.

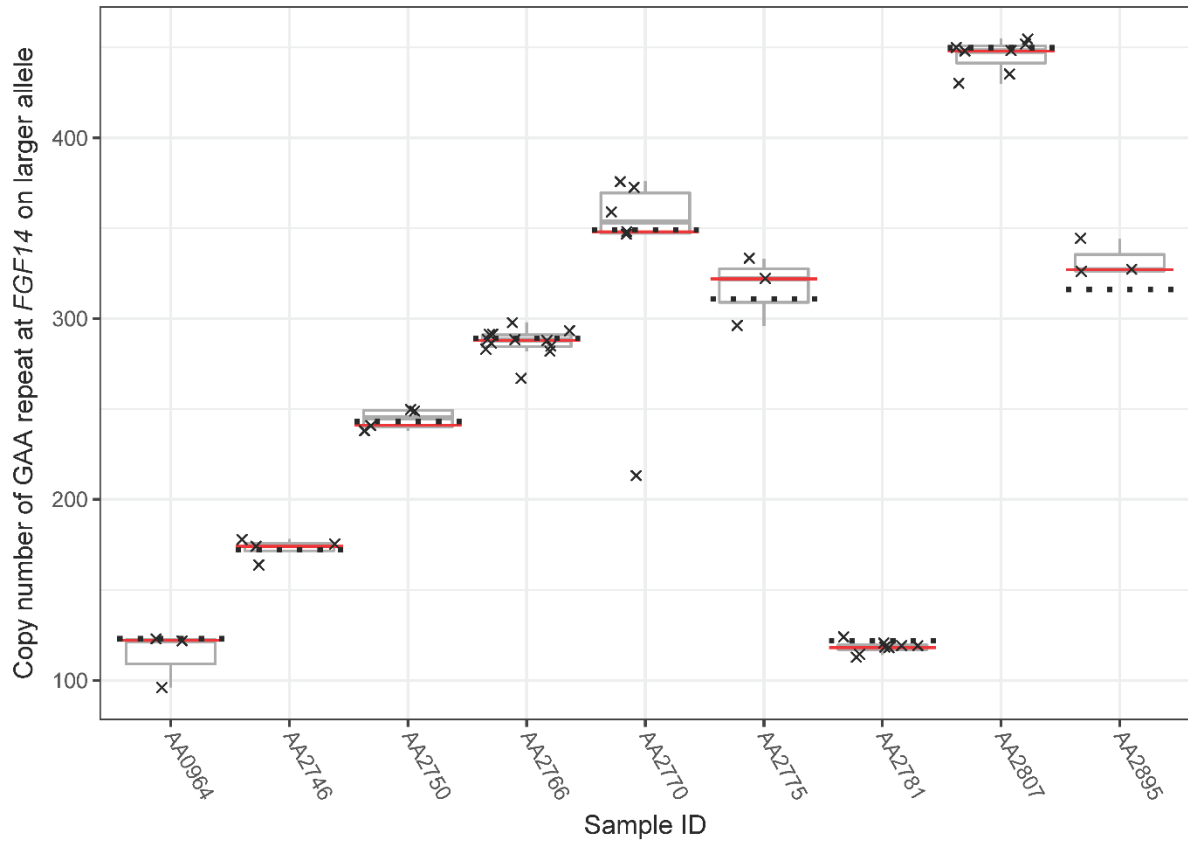

**Figure S3: Nanopore repeat size estimates concur with PCR estimates.** Eight probands were sequenced with Oxford Nanopore MinION adaptive sequencing targeting *FGF14*. The  $(GAA)_n$  repeat was genotyped in the long-read sequencing data using tandem-genotypes. Repeat sizes from Nanopore sequencing are shown for each read (crosses) and as a distribution (box plot), along with the tandem-genotypes (red line) and PCR (dotted line) size estimates for each sample. All samples except AA0964, AA2764 and AA2781 encoded a pathogenic *FGF14* allele.

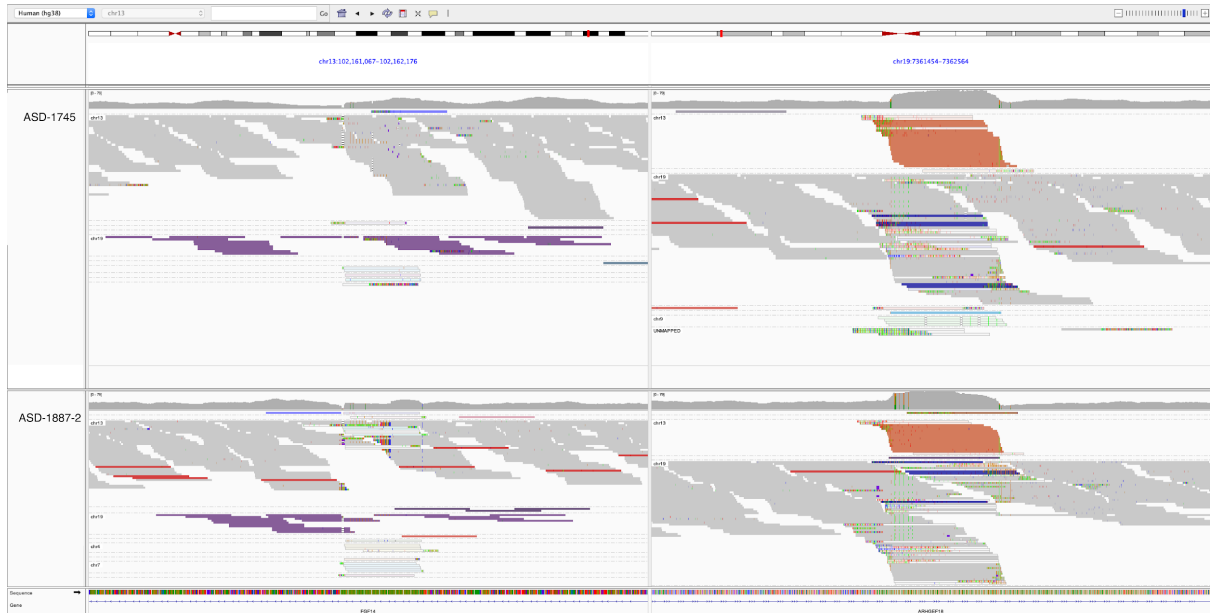

#### SF4: IGV snapshot of controls with unusual RP-PCR patterns

Visualization of the genome sequence reads in IGV for controls with an expanded GAAGGA RE at the *FGF14* (GAA)<sub>n</sub> STR (left panel). Reads coloured in purple uniquely map to the *FGF14* locus, however their read pairs map to a GAAGGA motif in another region of the genome (right panel, reads in orange).

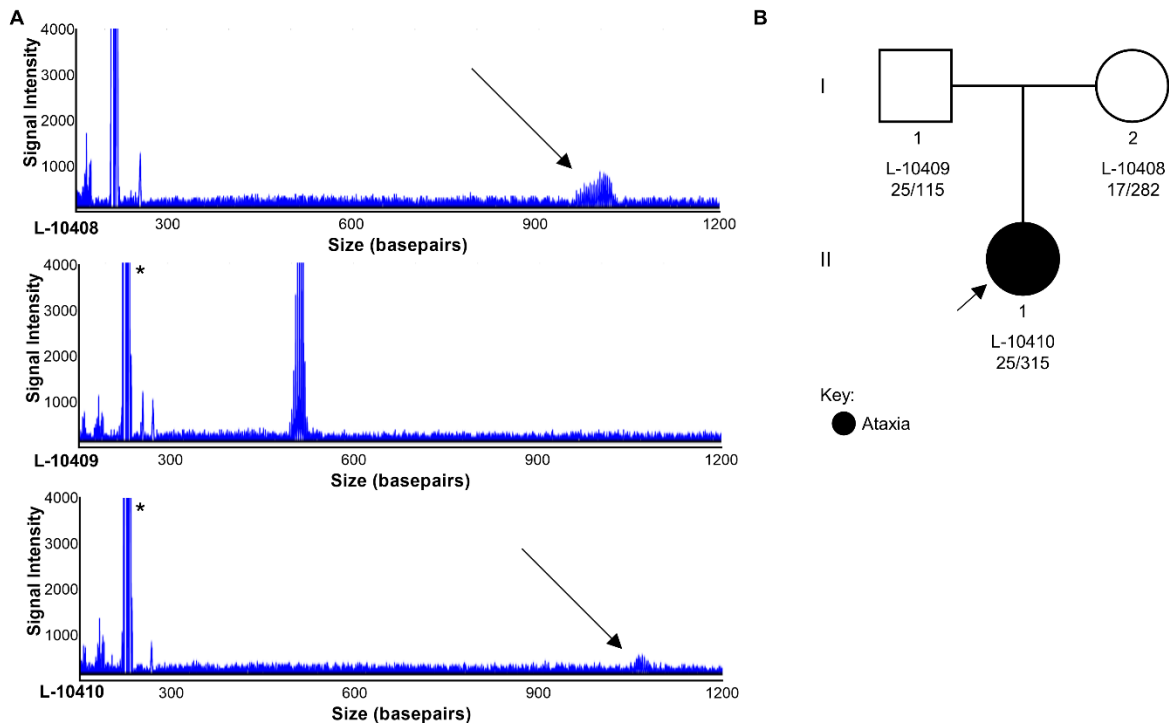

**Figure S5: Intergenerational expansion of *FGF14* (GAA)<sub>n</sub> STR**

LR-PCR electropherograms of *FGF14* STR by capillary array (A) for II-1 (L-10410) and unaffected parents (L-10408 and L-10409) (B). Allele sizing for L-10408 at this locus demonstrated that the paternal allele (GAA)<sub>25</sub> (indicated by \*) was inherited unchanged, whereas the maternal allele increased from (GAA)<sub>282</sub> to (GAA)<sub>315</sub> in the affected daughter.

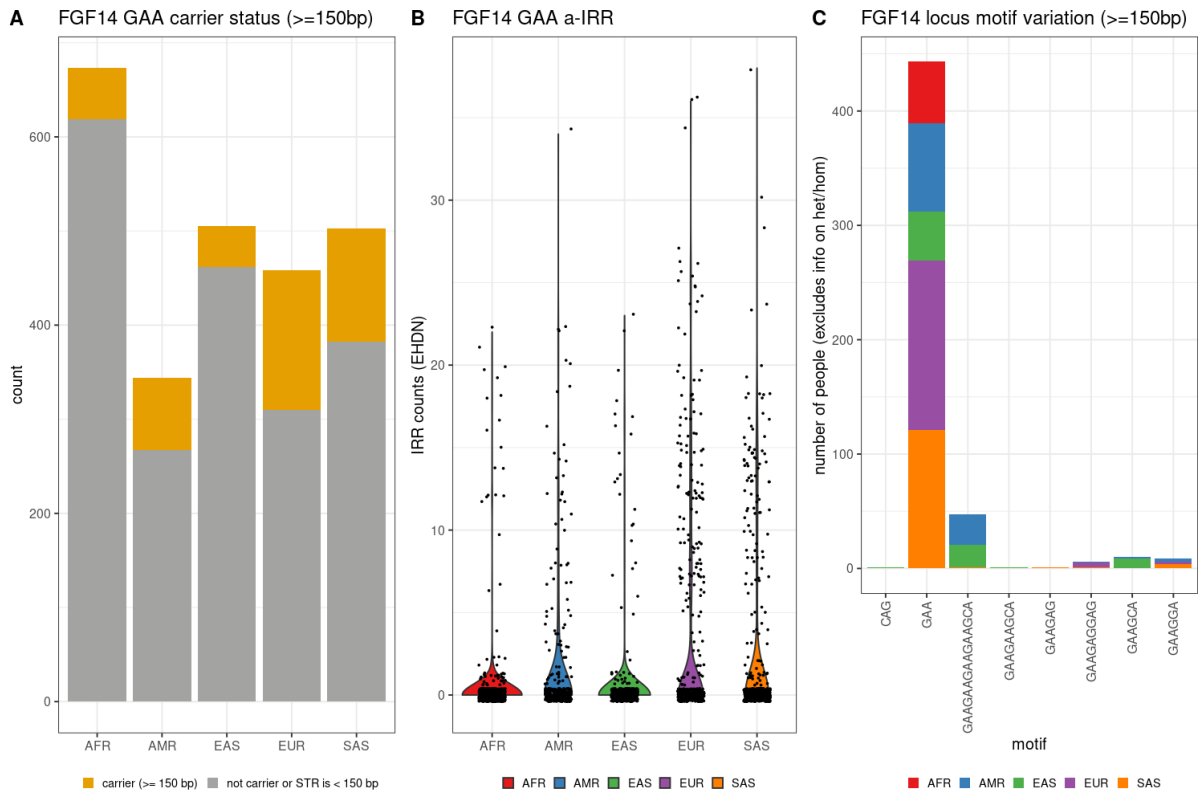

**Figure S6: Profiling the *FGF14* (GAA) RE locus in the 1000 Genomes Project.**

The *FGF14* (GAA) STR locus was profiled in 2483 unrelated individuals from the 1000 Genomes Project from African (AFR), admixed American (AMR), East Asian (EAS), European (EUR) and South Asian (SAS) populations. (A) Number of *FGF14* (GAA) STR carriers in the 1000 Genomes Project, by ethnicity. Carriers are defined as having an STR  $\geq$  150 bp (or 50 repeats). (B) Violin plot showing the distribution of the a-IRR for the *FGF14* (GAA) STR by ethnicity. Individuals without a reported a-IRR, either because they do not carry the STR, or they carry the STR with <150 bp (or 50 repeats), are coded as zero. (C) Bar chart showing the alternative motifs also detected at the *FGF14* (GAA) locus, split by ethnicity. Only motifs present at  $\geq$  150bp in at least one individual are reported.

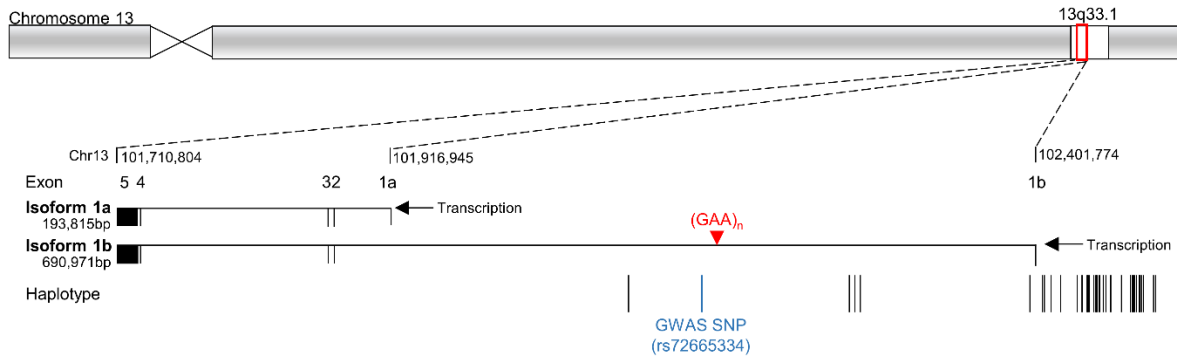

**Figure S7. *FGF14* genomic region, haplotype and isoform structure**

Schematic representation of the chromosomal location of *FGF14* to 13q33.1, illustrating the expression sites of two mRNA isoforms, 1a and 1b. Exon one of isoform 1b is located 5' of 1a, and the (GAA)<sub>n</sub> STR is located within the intervening intron. The remaining exons 2-5, are common to both isoforms. The SNP (rs72665334) identified by GWAS to be associated with down beat nystagmus is located ~10kb 3' of the (GAA)<sub>n</sub> STR. A common ancestral haplotype was determined for three Australian cases with (GAA)<sub>>250</sub> by comparing variant sharing around the *FGF14* STR (gnomAD AF<0.1) (specific haplotype details in Table S3).



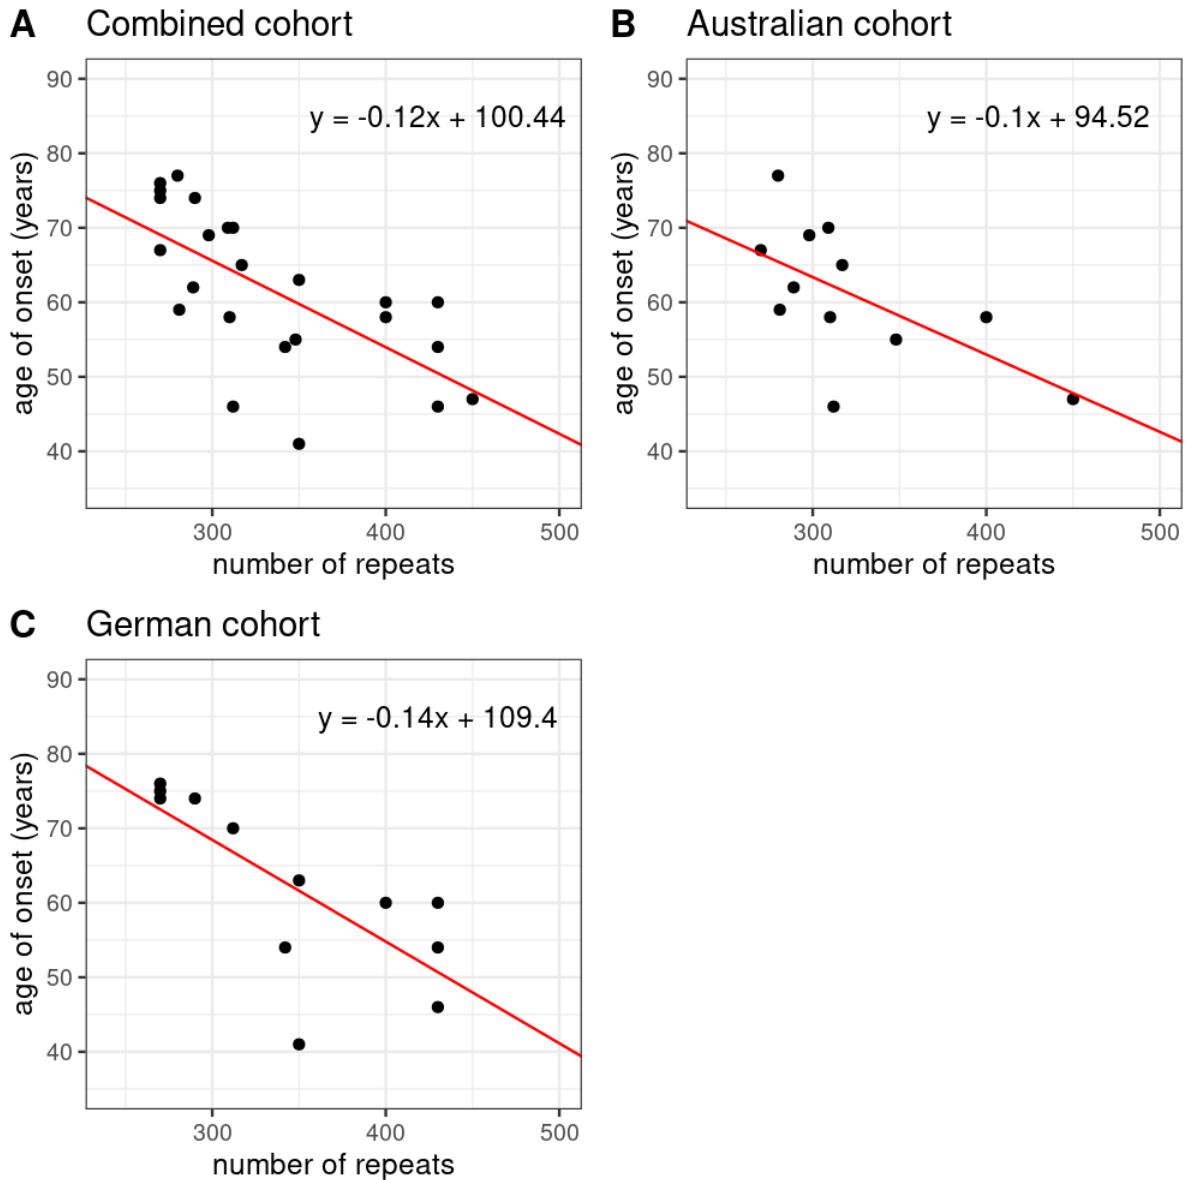

**Figure S8: Linear regression comparing *FGF14* (GAA)<sub>n</sub> RE number of repeats and age at onset.**

A linear regression was used to determine the relationship between ataxia age at onset and *FGF14* (GAA)<sub>n</sub> repeat length for the (A) combined (n=24), (B) Australian (n=12) and (C) German (n=12) cohorts. Repeat lengths were determined using LR-PCR. Individuals with ataxia of known age at onset with (GAA)<sub>>250</sub> were included in the analysis.

**Table S1: Primer sequences for analysis of *FGF14*.**

| <b>Primer name</b>  | <b>Position (hg38)</b>    | <b>Sequence</b>                          |
|---------------------|---------------------------|------------------------------------------|
| FGF14_RPP_F1        | chr13:102161468-102161490 | 5'-AGCAATCGTCAGTCAGTGTAAGC               |
| FGF14_LRP_R1        | chr13:102161762-102161782 | 5'-CAGTTCCTGCCCACATAGAGC                 |
| FGF14_RPP_F1_FAM    | chr13:102161468-102161490 | FAM-5'-AGCAATCGTCAGTCAGTGTAAGC           |
| FGF14_RPP_AAG_RE_R1 | NA                        | 5'-CAGGAAACAGCTATGACC CTTCTTCTTCTTCTTCTT |
| RPP_M13R            | NA                        | 5'-CAGGAAACAGCTATGACC                    |

The gene reference sequences utilized for *FGF14* were NC\_000013.11, NM\_004115.4 (Isoform 1a) and NM\_175929.3 (Isoform 1b).

**Table S2. *FGF14* allele sizing for individuals with (GAA)<sub>>250</sub> in Australian and German cohorts**

| Australian Cohort    |        |     |          |             |        |      |
|----------------------|--------|-----|----------|-------------|--------|------|
| Affected Individuals |        |     | Controls |             |        |      |
| Alias                | Allele |     | Alias    | Age (years) | Allele |      |
|                      | 1      | 2   |          |             | 1      | 2    |
| AA2807               | 170    | 450 | ASD1745  | 48          | 65     | 332* |
| AA2831               | 74     | 400 | C0063    | 61          | 12     | 300  |
| AA2903               | 19     | 400 | ASD1808  | 43          | 12     | 296* |
| AA2770               | 13     | 349 | ASD1887  | 38          | 22     | 282* |
| AA2895               | 58     | 316 | C0090    | 46          | 12     | 270  |
| AA0441               | 19     | 315 |          |             |        |      |
| AA2809               | 12     | 313 |          |             |        |      |
| AA2775               | 57     | 311 |          |             |        |      |
| AA2845               | 19     | 296 |          |             |        |      |
| AA2766               | 185    | 289 |          |             |        |      |
| AA2933               | 20     | 284 |          |             |        |      |
| AA2926               | 12     | 268 |          |             |        |      |
| AA2908               | 14     | 256 |          |             |        |      |

| German Validation Cohort |        |     |          |             |        |     |
|--------------------------|--------|-----|----------|-------------|--------|-----|
| Affected Individuals     |        |     | Controls |             |        |     |
| Alias                    | Allele |     | Alias    | Age (years) | Allele |     |
|                          | 1      | 2   |          |             | 1      | 2   |
| L-18362                  | 28     | 460 | L-3657   | 52          | 49     | 332 |
| L-14575                  | 29     | 460 | L-3656   | 56          | 315    | 330 |
| L-18384                  | 19     | 430 | L-3501   | 74          | 19     | 329 |
| L-17672                  | 20     | 430 | L-3344   | 54          | 54     | 328 |
| L-17665                  | 29     | 430 | D11      | 49          | 100    | 325 |
| L-20363                  | 54     | 400 | L-3479   | 51          | 52     | 325 |
| L-15166                  | 19     | 350 | L-3013   | 65          | 19     | 325 |
| L-15764                  | 87     | 350 | A10      | 87          | 19     | 290 |
| L-14630                  | 19     | 342 | C3       | 49          | 27     | 282 |
| L-10410                  | 25     | 315 | A5       | 42          | 19     | 257 |
| L-15891                  | 54     | 312 |          |             |        |     |
| L-15754                  | 19     | 290 |          |             |        |     |
| L-15629                  | 19     | 270 |          |             |        |     |
| L-15739                  | 59     | 270 |          |             |        |     |
| L-15713                  | 19     | 270 |          |             |        |     |

\*These samples have a (GAAGGA)<sub>n</sub> motif and are considered non-pathogenic.

**Table S3. Summary of *FGF14* core haplotype shared by three Australian individuals with (GAA)<sub>>250</sub>.**

| chr          | POS              | REF                       | ALT                            | SYMBOL       | AF            | Rs name           | AA2766                     | AA2770                     | AA2831                         |
|--------------|------------------|---------------------------|--------------------------------|--------------|---------------|-------------------|----------------------------|----------------------------|--------------------------------|
| chr13        | 102095119        | C                         | T                              | FGF14        | 0.008         | rs79181669        | 0/1                        | 0/1                        | 0/1                            |
| <b>chr13</b> | <b>102150076</b> | <b>C</b>                  | <b>T</b>                       | <b>FGF14</b> | <b>0.0218</b> | <b>rs72665334</b> | <b>0/1</b>                 | <b>0/1</b>                 | <b>0/1</b>                     |
| <b>chr13</b> | <b>102161575</b> | <b>(GAA)<sub>50</sub></b> | <b>(GAA)<sub>&gt;250</sub></b> | <b>FGF14</b> | -             | -                 | <b>(GAA)<sub>289</sub></b> | <b>(GAA)<sub>348</sub></b> | <b>(GAA)<sub>&gt;400</sub></b> |
| chr13        | 102261142        | G                         | A                              | FGF14        | 0.0154        | rs117891033       | 0/1                        | 0/1                        | 0/1                            |
| chr13        | 102264941        | T                         | C                              | FGF14        | 0.0297        | rs72647446        | 0/1                        | 0/1                        | 0/1                            |
| chr13        | 102269434        | C                         | T                              | FGF14        | 0.0291        | rs72647448        | 0/1                        | 0/1                        | 0/1                            |
| chr13        | 102396542        | G                         | C                              | FGF14        | 0.0771        | rs9557860         | 0/1                        | 0/1                        | 0/1                            |
| chr13        | 102405672        | A                         | G                              | FGF14        | 0.0891        | rs72649411        | 0/1                        | 0/1                        | 0/1                            |
| chr13        | 102407597        | C                         | T                              |              | 0.0944        | rs72649412        | 0/1                        | 0/1                        | 0/1                            |
| chr13        | 102412712        | T                         | G                              |              | 0.0903        | rs17690152        | 0/1                        | 0/1                        | 0/1                            |
| chr13        | 102419917        | G                         | T                              |              | 0.0879        | rs58913166        | 0/1                        | 0/1                        | 0/1                            |
| chr13        | 102432196        | G                         | A                              |              | 0.0914        | rs61593134        | 0/1                        | 0/1                        | 0/1                            |
| chr13        | 102435740        | A                         | G                              |              | 0.091         | rs2182843         | 0/1                        | 0/1                        | 0/1                            |
| chr13        | 102439745        | C                         | T                              |              | 0.0228        | rs4772471         | 0/1                        | 0/1                        | 0/1                            |
| chr13        | 102440446        | T                         | C                              |              | 0.0795        | rs114317848       | 0/1                        | 0/1                        | 0/1                            |
| chr13        | 102440534        | G                         | A                              |              | 0.099         | rs66678179        | 0/1                        | 0/1                        | 0/1                            |
| chr13        | 102441121        | T                         | C                              |              | 0.0795        | rs72649438        | 0/1                        | 0/1                        | 0/1                            |
| chr13        | 102444527        | G                         | A                              |              | 0.0797        | rs72649442        | 0/1                        | 0/1                        | 0/1                            |
| chr13        | 102446132        | T                         | C                              |              | 0.0801        | rs57911285        | 0/1                        | 0/1                        | 0/1                            |
| chr13        | 102446353        | A                         | T                              |              | 0.0781        | rs57461252        | 0 1                        | 0 1                        | 0 1                            |
| chr13        | 102446354        | A                         | C                              |              | 0.0795        | rs60040500        | 0 1                        | 0 1                        | 0 1                            |
| chr13        | 102447030        | C                         | T                              |              | 0.0863        | rs116926265       | 0/1                        | 0/1                        | 0/1                            |
| chr13        | 102447183        | A                         | G                              |              | 0.0801        | rs117258042       | 0/1                        | 0/1                        | 0/1                            |
| chr13        | 102448603        | G                         | C                              |              | 0.0801        | rs1927360         | 0 1                        | 0/1                        | 0/1                            |
| chr13        | 102448793        | A                         | T                              |              | 0.0801        | rs1927361         | 0/1                        | 0/1                        | 0/1                            |
| chr13        | 102451762        | C                         | T                              |              | 0.0799        | rs55665569        | 0/1                        | 0/1                        | 0/1                            |
| chr13        | 102453431        | A                         | G                              |              | 0.0813        | rs12585989        | 0/1                        | 0/1                        | 0/1                            |
| chr13        | 102457322        | T                         | G                              |              | 0.0801        | rs55686828        | 0/1                        | 0/1                        | 0/1                            |
| chr13        | 102465342        | T                         | C                              |              | 0.0825        | rs55638789        | 0/1                        | 0/1                        | 0/1                            |
| chr13        | 102472363        | G                         | A                              |              | 0.0731        | rs72649478        | 0 1                        | 0 1                        | 0 1                            |
| chr13        | 102473510        | G                         | T                              |              | 0.0996        | rs72649480        | 0/1                        | 0/1                        | 0/1                            |
| chr13        | 102474084        | A                         | G                              |              | 0.091         | rs114125113       | 0/1                        | 0/1                        | 0/1                            |
| chr13        | 102474982        | A                         | T                              |              | 0.0968        | rs77919312        | 0 1                        | 0 1                        | 0 1                            |
| chr13        | 102476968        | C                         | T                              |              | 0.0729        | rs56164689        | 0/1                        | 0/1                        | 0/1                            |
| chr13        | 102478700        | C                         | T                              |              | 0.0713        | rs72649487        | 0/1                        | 0/1                        | 0/1                            |
| chr13        | 102478941        | T                         | C                              |              | 0.0783        | rs72649488        | 0/1                        | 0/1                        | 0/1                            |
| chr13        | 102479117        | C                         | T                              |              | 0.0783        | rs55850322        | 0/1                        | 0/1                        | 0/1                            |
| chr13        | 102480213        | T                         | C                              |              | 0.0713        | rs56287885        | 0/1                        | 0/1                        | 0/1                            |
| chr13        | 102481686        | A                         | AG                             |              | 0.0723        | rs55728938        | 0/1                        | 0/1                        | 0/1                            |
| chr13        | 102489485        | C                         | T                              |              | 0.0951        | rs17634018        | 0/1                        | 0/1                        | 0/1                            |
| chr13        | 102491020        | T                         | C                              |              | 0.0649        | rs17634060        | 0/1                        | 0/1                        | 0/1                            |

## Supplementary Materials and Methods

### RNA and protein analyses

Primary fibroblasts were established from three affected individuals and four unrelated sex and age matched controls using standard techniques. Cells were cultured as previously described<sup>1</sup> with RNA extracted (RNeasy Mini Kit, #74104, QIAGEN) and cDNA generated (QuantiTect Reverse Transcription Kit, #205313, QIAGEN) according to the manufacturer's instructions. Gene expression was analyzed using TaqMan Gene Expression Assays designed to identify all *FGF14* mRNA isoforms (Hs00738588, Thermo Fisher Scientific) or specifically the brain isoform 1b (Hs02888324, Thermo Fisher Scientific) according to the manufacturer's protocol. Protein was isolated and analyzed by Western blot as previously described<sup>2</sup> utilizing an antibody directed against FGF14 (UC Davis/NIH NeuroMab, #75-096).

## Supplementary References

1. Wilson, G.R., Sunley, J., Smith, K.R., Pope, K., Bromhead, C.J., Fitzpatrick, E., Di Rocco, M., van Steensel, M., Coman, D.J., Leventer, R.J., et al. (2013). Mutations in SH3PXD2B cause Borrone dermatocardio-skeletal syndrome. *European journal of human genetics : EJHG*. 10.1038/ejhg.2013.229.
2. Barbier, M., Bahlo, M., Pennisi, A., Jacoupy, M., Tankard, R.M., Ewencyk, C., Davies, K.C., Lino-Coulon, P., Colace, C., Rafehi, H., et al. (2022). Heterozygous PNPT1 Variants Cause Spinocerebellar Ataxia Type 25. *Annals of neurology* 92, 122-137. 10.1002/ana.26366.
